# Supplementary material for: Nonprecious catalytic honeycombs structured with three dimensional hierarchical Co3O4 nano-arrays for high performance nitric oxide oxidation
Source: Royal Society of Chemistry journal article supplement (doi:10.1039/c3ta11156c), 2013-01-01
Supplement: c3ta11156c.pdf [file c3ta11156c.pdf]

## Supporting Information

### **Nonprecious Catalytic Honeycombs Structured with Three Dimensional Hierarchical $\text{Co}_3\text{O}_4$ Nano-arrays for High Performance Nitric Oxide Oxidation**

Zheng Ren,<sup>1</sup> Yanbing Guo,<sup>1</sup> Zhonghua Zhang,<sup>1</sup> Caihong Liu,<sup>1,2</sup> and Pu-Xian Gao<sup>1,2,\*</sup>

<sup>1</sup>Department of Materials Science and Engineering & Institute of Materials Science, University of Connecticut, Storrs, Connecticut 06269-3136, USA

<sup>2</sup> Center for Clean Energy Engineering, University of Connecticut, Storrs, Connecticut 06269-5233, USA

Email: [puxian.gao@ims.uconn.edu](mailto:puxian.gao@ims.uconn.edu)

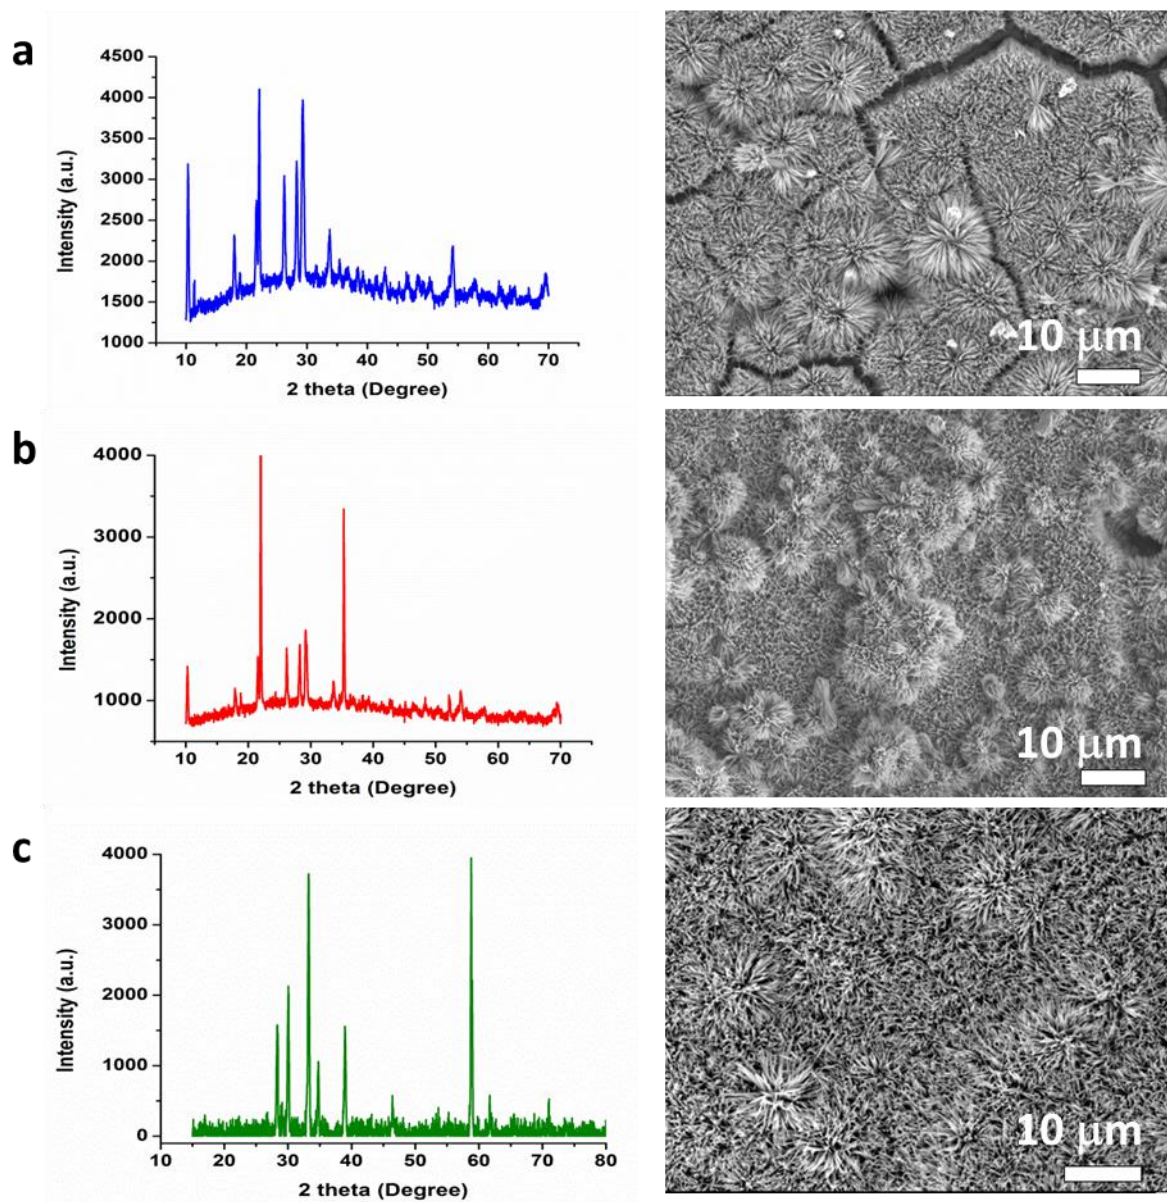

**Figure S1.** SEM images and corresponding XRD patterns of precursor cobalt hydroxyl carbonate nano-arrays on honeycomb substrate synthesized from a) cobalt nitrate; b) cobalt acetate and c) cobalt chloride.

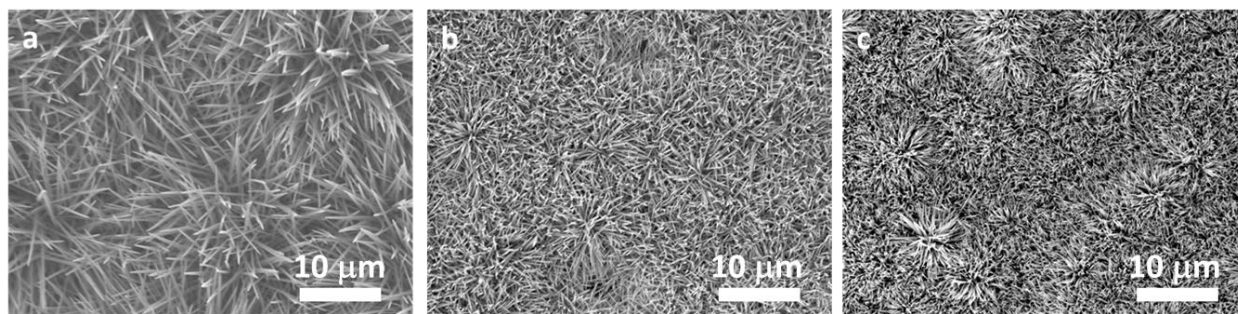

**Figure S2.** Morphology of  $\text{Co}_3\text{O}_4$  nano-arrays prepared from cobalt chloride after a) 4 hours; b) 8 hours and c) 12 hours.

The morphology evolution of  $\text{Co}_3\text{O}_4$  prepared from cobalt chloride show that elongated reaction time only increases the density of nano-arrays and improves the uniformity.

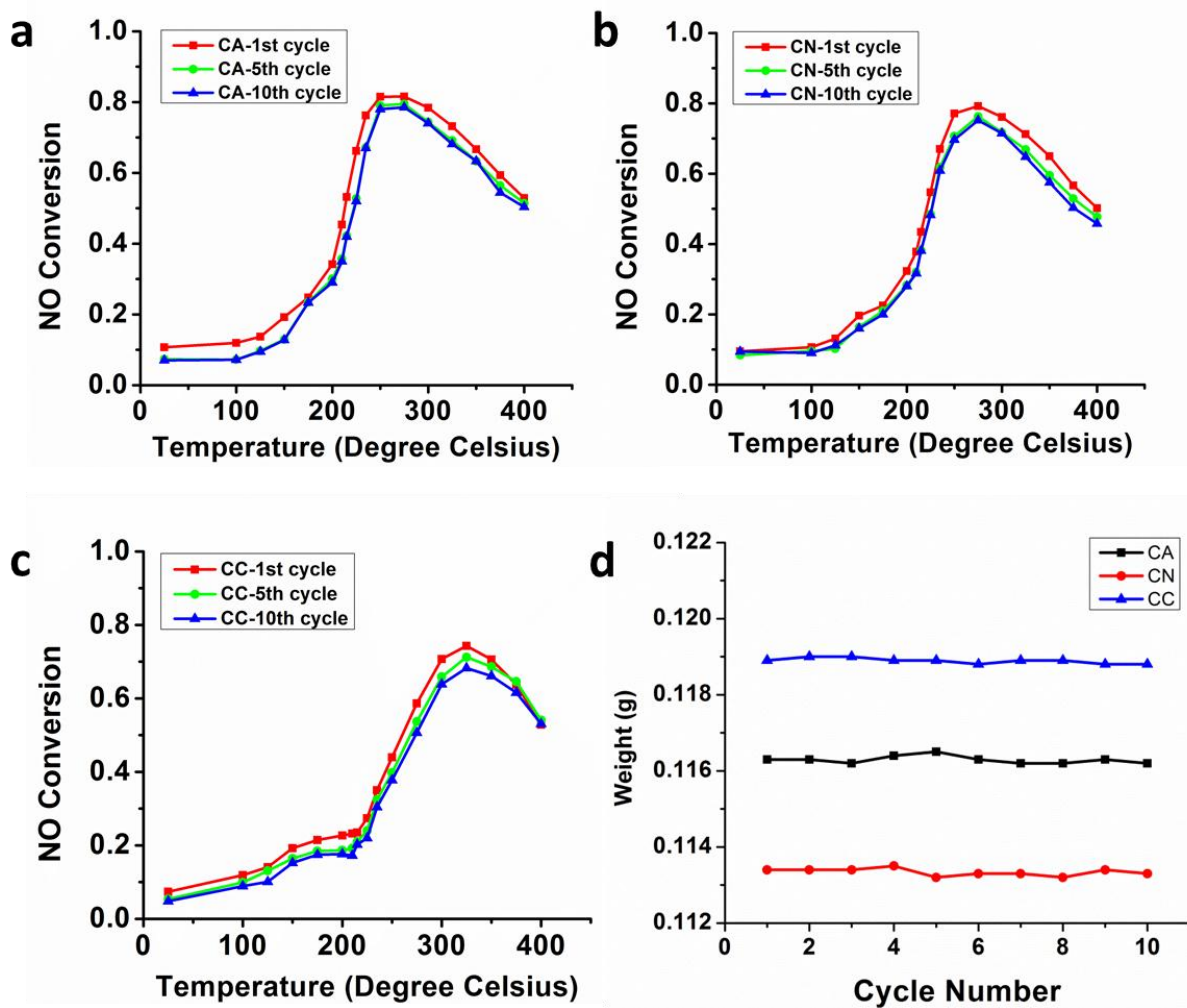

**Figure S3.** Cyclic catalytic NO oxidation performance by (a) CA; (b) CN and (c) CC. (d) Weight measurement of catalytic honeycombs during cyclic test.



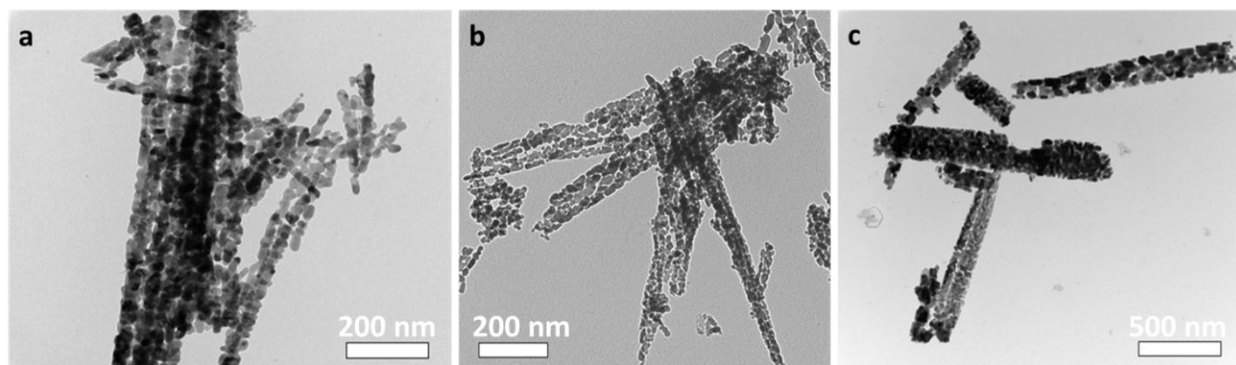

**Figure S4.** TEM characterization of  $\text{Co}_3\text{O}_4$  nano-arrays prepared from a) cobalt nitrate; b) cobalt acetate and c) cobalt chloride.

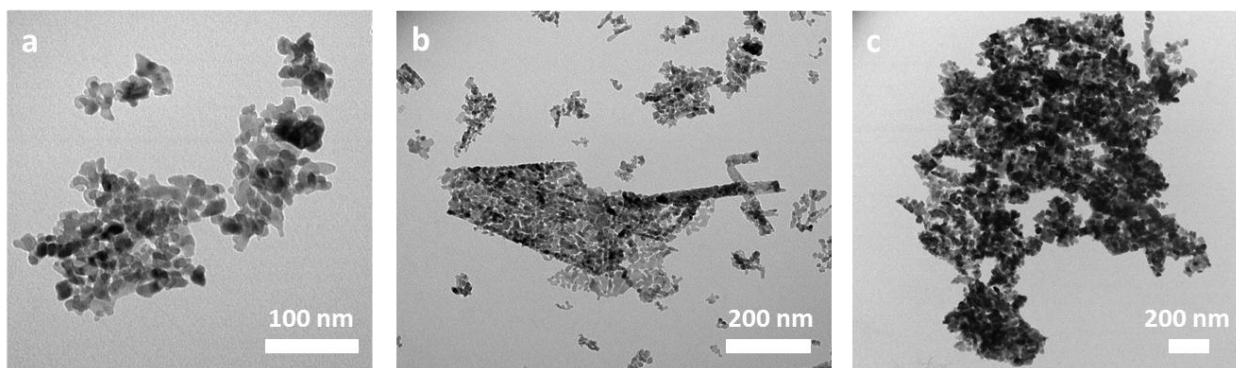

**Figure S5.** TEM characterization of  $\text{Co}_3\text{O}_4$  nanopowders prepared from a) cobalt acetate; b) cobalt nitrate and c) cobalt chloride.

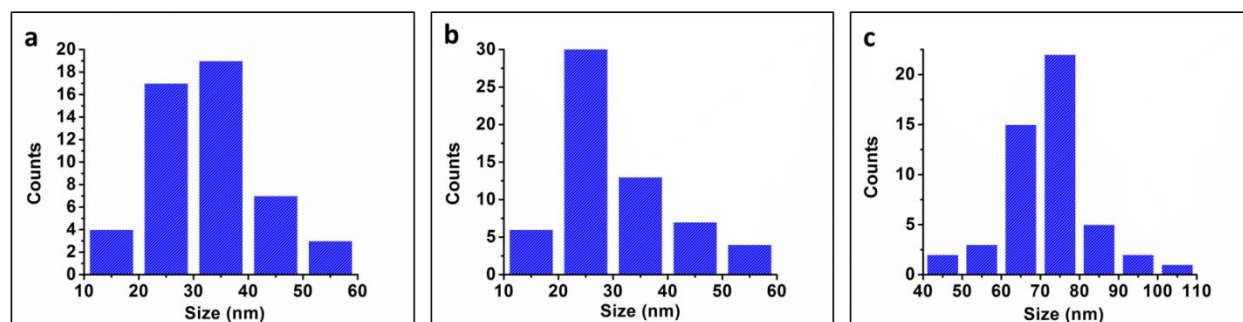

**Figure S6.** Statistical grain size distribution of  $\text{Co}_3\text{O}_4$  prepared from different cobalt sources as observed in the TEM images in Figure S4. a) cobalt nitrate; b) cobalt acetate; c) cobalt chloride.

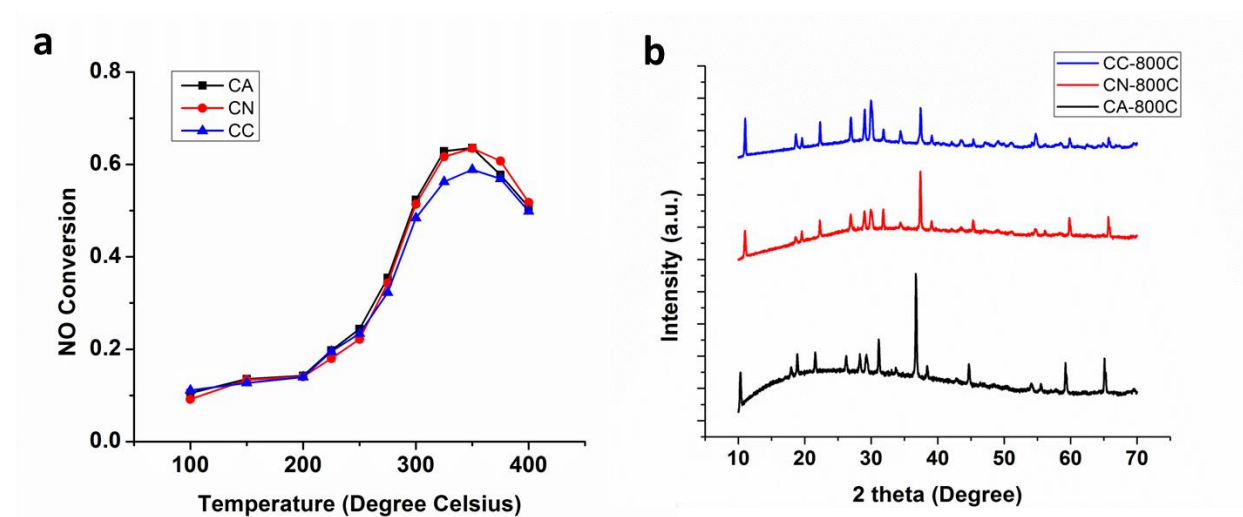

**Figure S7.** a) Catalytic NO oxidation performance of  $\text{Co}_3\text{O}_4$  nano-arrays based catalytic honeycombs prepared by annealing at 800 °C. b) XRD spectra of 800 °C annealed  $\text{Co}_3\text{O}_4$  nano-arrays honeycombs.

**Table S1.** Apparent activation energy, pre-exponential factor and turn-over frequency.

| Temperature (°C) | Conversion | Rate (mol g <sup>-1</sup> s <sup>-1</sup> ) | TOF (s <sup>-1</sup> ) |
|------------------|------------|---------------------------------------------|------------------------|
| 110              | 10%        | $6.54 \times 10^{-7}$                       | $8.1 \times 10^{-5}$   |
| 120              | 12%        | $7.70 \times 10^{-7}$                       | $9.5 \times 10^{-5}$   |
| 130              | 14.2%      | $9.11 \times 10^{-7}$                       | $1.12 \times 10^{-4}$  |
| 140              | 16.3%      | $1.05 \times 10^{-6}$                       | $1.29 \times 10^{-4}$  |
| 150              | 18.8%      | $1.21 \times 10^{-6}$                       | $1.49 \times 10^{-4}$  |

**Co<sub>3</sub>O<sub>4</sub> prepared from cobalt acetate:** Apparent activation energy  $E_a = 20.6$  kJ/mol.

$$\text{Pre-exponential factor } k_0 = 5433 \text{ mol} \cdot \text{g}^{-1} \cdot \text{s}^{-1}$$

| Temperature (°C) | Conversion | Rate (mol g <sup>-1</sup> s <sup>-1</sup> ) | TOF (s <sup>-1</sup> ) |
|------------------|------------|---------------------------------------------|------------------------|
| 110              | 10.9%      | $7.16 \times 10^{-7}$                       | $8.6 \times 10^{-5}$   |
| 120              | 12.9%      | $8.47 \times 10^{-7}$                       | $1.02 \times 10^{-4}$  |
| 130              | 15.2%      | $9.98 \times 10^{-7}$                       | $1.2 \times 10^{-4}$   |
| 140              | 17.3%      | $1.14 \times 10^{-6}$                       | $1.37 \times 10^{-4}$  |
| 150              | 19.8%      | $1.30 \times 10^{-6}$                       | $1.57 \times 10^{-4}$  |

**Co<sub>3</sub>O<sub>4</sub> prepared from cobalt nitrate:** Apparent activation energy  $E_a = 20.1$  kJ/mol.

$$\text{Pre-exponential factor } k_0 = 5102 \text{ mol} \cdot \text{g}^{-1} \cdot \text{s}^{-1}$$

| Temperature (°C) | Conversion | Rate (mol g <sup>-1</sup> s <sup>-1</sup> ) | TOF (s <sup>-1</sup> ) |
|------------------|------------|---------------------------------------------|------------------------|
| 110              | 9.80%      | $6.13 \times 10^{-7}$                       | $8.56 \times 10^{-5}$  |
| 120              | 11.60%     | $7.25 \times 10^{-7}$                       | $1.01 \times 10^{-4}$  |
| 130              | 13.60%     | $8.50 \times 10^{-7}$                       | $1.18 \times 10^{-4}$  |
| 140              | 15.70%     | $9.82 \times 10^{-7}$                       | $1.37 \times 10^{-4}$  |
| 150              | 17.80%     | $1.11 \times 10^{-6}$                       | $1.55 \times 10^{-4}$  |

**Co<sub>3</sub>O<sub>4</sub> prepared from cobalt chloride:** Apparent activation energy  $E_a = 20.1 \text{ kJ/mol}$ .

$$\text{Pre-exponential factor } k_0 = 3840 \text{ mol} \cdot \text{g}^{-1} \cdot \text{s}^{-1}$$

The apparent activation energy and pre-exponential factor is obtained by the Arrhenius plot of  $\ln k$  vs  $(-1/T)$ . Reaction constant value  $k$  was calculated from reaction rate  $r = kP_{\text{NO}}^a P_{\text{O}_2}^b$  where  $a$  and  $b$  are the reaction orders determined from Figure 4. The turn-over frequency is calculated by using  $\text{Co}^{3+}$  as the active sites. The population ratio of  $\text{Co}^{3+}$  and  $\text{Co}^{2+}$  is determined from deconvoluted XPS spectra in Figure 5. In CA and CN the  $\text{Co}^{3+}$  possesses 65% while in CC this proportion is 59%.

TOF calculation:

$$\text{TOF} = \frac{\text{Converted NO (mol} \cdot \text{s}^{-1}\text{)}}{\text{Active sites number (mol)}}$$

$$\text{Converted NO (mol} \cdot \text{s}^{-1}\text{)} = \frac{500 \text{ ppm} \times \text{conversion (\%)} \times \text{flow rate (L} \cdot \text{s}^{-1}\text{)}}{22.4 \text{ L/mol}}$$

where flow rate=200 mL/min=1/300 (L/s).

$$\text{Active sites number (mol)} = 3 \times \frac{m_{\text{Co}_3\text{O}_4}}{M_{\text{Co}_3\text{O}_4}} \times \eta$$



where  $m_{Co_3O_4}$  stands for the mass of the grown  $Co_3O_4$  nano-arrays on the honeycomb,  $M_{Co_3O_4}$  represents the molecular weight of  $Co_3O_4$  (240 g/mol) and  $\eta$  is the portion of  $Co^{3+}$ , which is determined by XPS analysis. Specifically, for CA and CN nano-arrays,  $\eta = 65\%$  while for CC nano-array,  $\eta = 59\%$ .

**Table S2.** Surface area calculation.

| With honeycombs | Grain size (nm) | BET surface area (m <sup>2</sup> /g) | Pore diameter(nm) |
|-----------------|-----------------|--------------------------------------|-------------------|
| CA-300 C        | 20-30           | 12.5                                 | 15                |
| CN-300 C        | 25-40           | 16.1                                 | 15                |
| CC-300 C        | 60-80           | 8.4                                  | 25                |

In addition to the grain size, the BET surface area of the honeycombs decorated with  $Co_3O_4$  nano-arrays are listed in Table S2. It can be seen from Figure S4b that CN has a relatively larger pore volume compared with CA, which might contribute to its larger surface area.

The BET surface area of blank honeycombs was measured to be  $0.35 \text{ m}^2 \text{ g}^{-1}$ . We assume the measured BET surface area of honeycombs structured with nano-arrays is approximately the linear summation of contributions from blank honeycomb and the nano-arrays. The weight of nano-arrays constitutes ~10% of the total weight of honeycombs. Therefore, the BET surface area of nano-arrays  $S_A$  in Figure 6 is calculated by

$$S_A = \frac{S(m_h + m_A) - S_h m_h}{m_A}$$

$m_h$ : mass of the honeycomb;

$m_A$ : mass of the nano-arrays (weight difference of honeycomb substrate before and after nano-arrays growth);

$S_h$ : BET surface area of blank honeycomb;

$S$ : BET surface area of honeycomb structured with  $\text{Co}_3\text{O}_4$  nano-arrays.

The same computation is used for results in Table S3 and Table S4.

| With honeycombs | BET surface area ( $\text{m}^2/\text{g}$ ) | Pore size (nm) |
|-----------------|--------------------------------------------|----------------|
| CA-powders      | 4.8                                        | 12             |
| CN-powders      | 3.8                                        | 15-20          |
| CC-powders      | 3.7                                        | 30             |

**Table S3.** BET surface area characterization and pore size distribution results for  $\text{Co}_3\text{O}_4$  nanopowders prepared by the same hydrothermal process as nano-arrays synthesized from different cobalt precursors.

| With honeycombs | Grain size (nm) | BET surface area ( $\text{m}^2/\text{g}$ ) |
|-----------------|-----------------|--------------------------------------------|
| CA-800 C        | 150-200         | 4.3                                        |
| CN-800 C        | 150-200         | 4.2                                        |
| CC-800 C        | 150-200         | 4                                          |

**Table S4.** Grain size and BET surface area results for 800 °C annealed nano-arrays synthesized from different cobalt precursors.
